# Supplementary material for: The Relationship between 25 (OH) D Levels (Vitamin D) and Bone Mineral Density (BMD) in a Saudi Population in a Community-Based Setting
Source: PubMed Central journal article supplement (PMC5207714; doi:10.1371/journal.pone.0169122), 2017-01-03

# VD deficiency among Genders

■ Male ■ Female

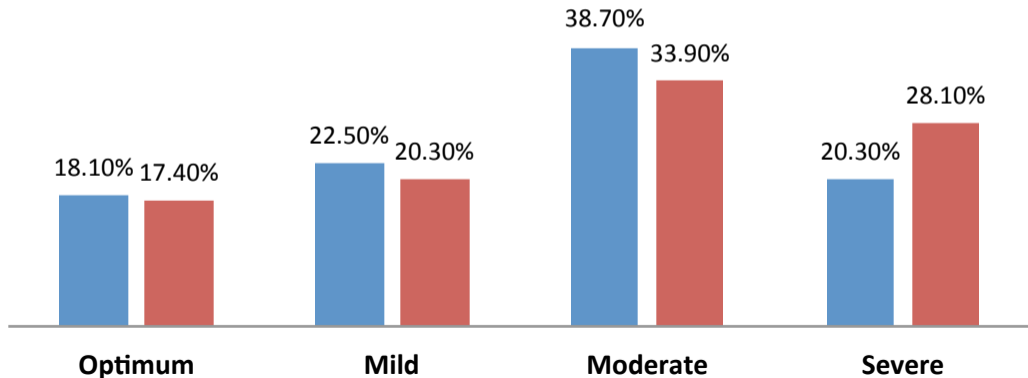

Supplement: pone.0169122.s002.pdf [file pone.0169122.s002.pdf]
